# Supplementary material for: Pyrolysis Process of Mixed Microplastics Using TG-FTIR and TED-GC-MS
Source: MDPI journal article supplement (doi:10.3390/polym15010241), 2023-01-03
Supplement: s1 [file s1]

## Supplementary material

### *Pyrolysis process of mixed microplastics using TG-FTIR and TED-GC-MS*

Minhyun Cho<sup>a</sup>, Yujin Song<sup>a</sup>, Chan Joo Rhu<sup>a</sup>, Byungrye Go<sup>a\*</sup>

<sup>a</sup>Korea Conformity Laboratories. 199, Gasan digital 1-ro, Seoul 08503, South Korea

\*Corresponding author.

E-mail address: [innate@kcl.re.kr](mailto:innate@kcl.re.kr)

**Table S1. Material information, ultimate analysis of microplastics**

| Sample | Ultimate analysis (wt.%) |       |       |   |   |       |
|--------|--------------------------|-------|-------|---|---|-------|
|        | C                        | H     | O     | N | S | Cl    |
| PP     | 85.08                    | 13.98 | -     | - | - |       |
| PET    | 62.58                    | 4.31  | 33.12 | - | - |       |
| PVC    | 39.27                    | 5.02  | 0.68  | - | - | 55.03 |

**Table S2. GC-MS instrumental parameter**

| Parameter                        | Set value            |
|----------------------------------|----------------------|
| CIS ramp rate                    | 12K/s                |
| CIS final temperature, hold time | 543K, 5min           |
| CIS split                        | 20:1                 |
| GC initial temperature           | 313K                 |
| GC He flow rate                  | 1ml/min              |
| GC temperature ramp              | 5K/min               |
| GC final temperature, hold time  | 573K, 5min           |
| GC column                        | HP-5MS (Agilent J&W) |
| MS ion source temperature        | 503K                 |
| MS Quad temperature              | 423K                 |

**Table S3. Thermogravimetric stage and Tmax for single polymer and MP**

|                    | PP      | PET     | PVC     | MP               |
|--------------------|---------|---------|---------|------------------|
| 1st stage Temp (K) | 630-770 | 660-775 | 460-650 | 520-650          |
| T <sub>max</sub>   | 739     | 725     | 605     | 601              |
| 2nd stage Temp (K) | -       | -       | 670-800 | 670-735, 735-795 |
| T <sub>max</sub>   |         |         | 740     | 728, 754         |

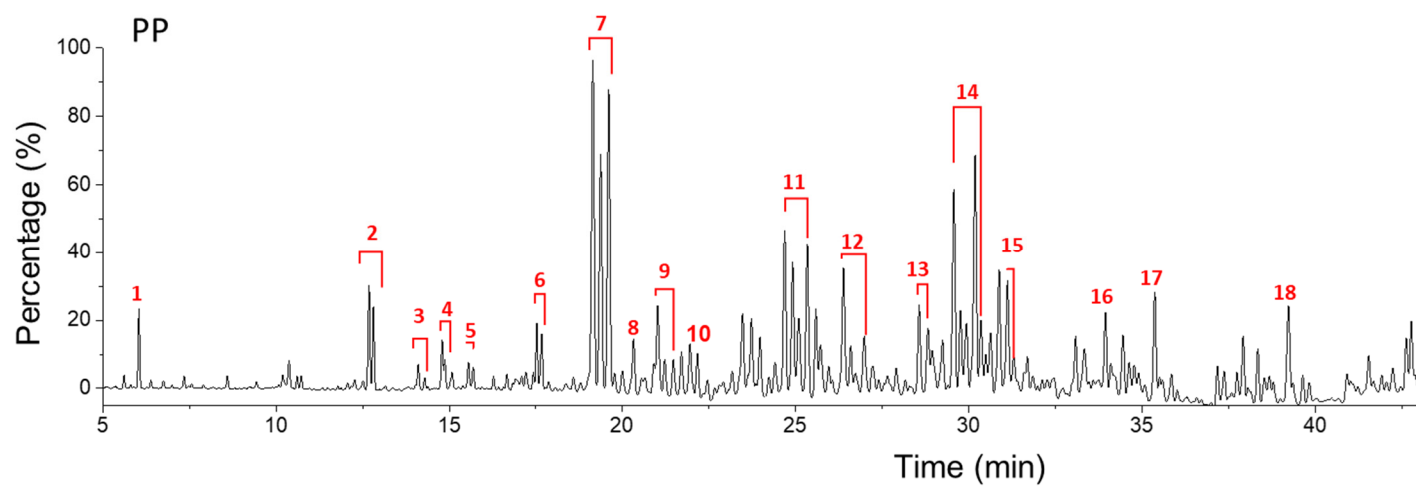

**Figure S1. Single TED-GC-MS chromatogram of PP**

**Table S4. Thermal degradation compounds of PP shown in Figure S1**

| No.  | RT/min           | Compound                          | Structure                                                                            | Formula                         |
|------|------------------|-----------------------------------|--------------------------------------------------------------------------------------|---------------------------------|
| PP 1 | 6.044            | 2,4-Dimethyl-1-heptene            | 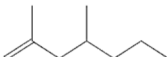    | C <sub>9</sub> H <sub>18</sub>  |
| PP 2 | 12.691<br>12.816 | 2,4,6-Trimethyl-1-nonene          |     | C <sub>12</sub> H <sub>24</sub> |
| PP 3 | 14.104<br>14.289 | 2,4,6,8-Tetramethyl-1-nonene      |   | C <sub>13</sub> H <sub>26</sub> |
| PP 4 | 14.794<br>14.876 | 2,4,6,8-Tetramethyl-1,8-nonadiene |  | C <sub>13</sub> H <sub>24</sub> |
| PP 5 | 15.555<br>15.691 | 2,4,6,8-Tetramethyl-1-undecene    |  | C <sub>15</sub> H <sub>30</sub> |

|       |                            |                                                          |                                                                                      |                |
|-------|----------------------------|----------------------------------------------------------|--------------------------------------------------------------------------------------|----------------|
| PP 6  | 17.528<br>17.674           | 2,4,6,8,10,12-<br>Hexamethyl-1,12-<br>tridecadiene       | 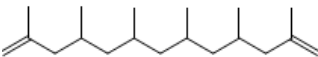   | $C_{19}H_{36}$ |
| PP 7  | 19.154<br>19.375<br>19.613 | 2,4,6,8-Tetramethyl-<br>1-undecene                       |    | $C_{15}H_{30}$ |
| PP 8  | 20.319                     | 2,4,6,8,10-<br>Pentamethyl-1-<br>undecene                |    | $C_{16}H_{32}$ |
| PP 9  | 21.017<br>21.220<br>21.467 | 2,4,6,8,10-<br>Pentamethyl-1,10-<br>undecadiene          |  | $C_{16}H_{30}$ |
| PP 10 | 22.165                     | 2,4,6,8-Tetramethyl-<br>1-undecene                       |  | $C_{15}H_{30}$ |
| PP 11 | 23.471<br>23.728<br>23.975 | 2,4,6,8,10,12,14-<br>Heptamethyl-1,14-<br>pentadecadiene |  | $C_{22}H_{42}$ |

|       |        |                                                      |                                                                                      |                |
|-------|--------|------------------------------------------------------|--------------------------------------------------------------------------------------|----------------|
| PP 12 | 26.385 | 2,4,6,8,10,12-                                       | 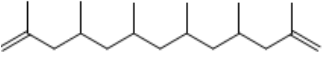   | $C_{19}H_{36}$ |
|       | 26.588 | Hexamethyl-1,12-                                     |                                                                                      |                |
|       | 26.986 | tridecadiene                                         |                                                                                      |                |
| PP 13 | 28.566 | 2,4,6,8,10,12,14-                                    |    | $C_{22}H_{42}$ |
|       | 28.822 | Heptamethyl-1,14-pentadecadiene                      |                                                                                      |                |
| PP 14 | 29.564 | 2,4,6,8,10,12-Hexamethyl-1-pentadecene               |    | $C_{21}H_{42}$ |
|       | 29.758 |                                                      |                                                                                      |                |
|       | 29.935 |                                                      |                                                                                      |                |
|       | 30.182 |                                                      |                                                                                      |                |
|       | 30.341 |                                                      |                                                                                      |                |
| PP 15 | 31.118 | 2,4,6,8,10,12,14-                                    |  | $C_{22}H_{42}$ |
|       | 31.286 | Heptamethyl-1,14-pentadecadiene                      |                                                                                      |                |
| PP 16 | 33.943 | 2,4,6,8,10,12,14,16,18-nonamethyl-1-heneicosene      |  | $C_{30}H_{60}$ |
| PP 17 | 35.374 | 2,4,6,8,10,12,14,16,18-Nonamethyl-1,18-nonadecadiene |  | $C_{28}H_{54}$ |

|       |        |                                                                                  |                                                                                    |                |
|-------|--------|----------------------------------------------------------------------------------|------------------------------------------------------------------------------------|----------------|
| PP 18 | 39.232 | 2,4,6,8,10,12,14,16,<br>18,20,22,24,26-<br>Tridecamethyl-1,26-<br>heptacosadiene | 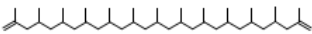 | $C_{40}H_{78}$ |
|-------|--------|----------------------------------------------------------------------------------|------------------------------------------------------------------------------------|----------------|

---



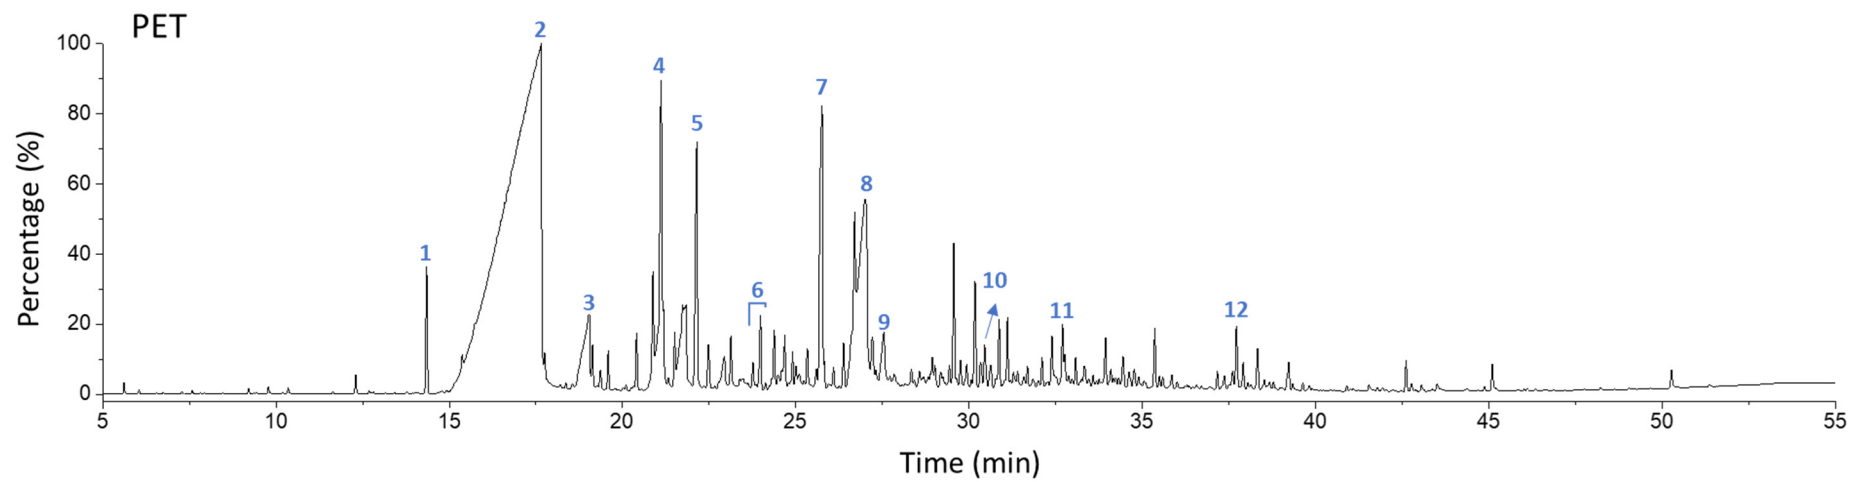

**Figure S2. Single TED-GC-MS chromatogram of PET**

**Table S5. Thermal degradation compounds of PET shown in Figure S2**

| No.   | RT/min           | Compound                | Structure                                                                           | Formula                                       |
|-------|------------------|-------------------------|-------------------------------------------------------------------------------------|-----------------------------------------------|
| PET 1 | 14.346           | Vinyl benzoate          | 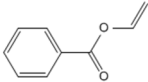   | C <sub>9</sub> H <sub>8</sub> O <sub>2</sub>  |
| PET 2 | 17.667           | Benzoic acid            |    | C <sub>7</sub> H <sub>6</sub> O <sub>2</sub>  |
| PET 3 | 19.032           | 4-Methylbenzoic acid    |   | C <sub>8</sub> H <sub>8</sub> O <sub>2</sub>  |
| PET 4 | 21.120           | Biphenyl                |  | C <sub>12</sub> H <sub>10</sub>               |
| PET 5 | 22.151           | 2-Hydroxyethyl benzoate |  | C <sub>9</sub> H <sub>10</sub> O <sub>3</sub> |
| PET 6 | 23.771<br>23.983 | 2-Methylbiphenyl        |  | C <sub>13</sub> H <sub>12</sub>               |

|        |        |                            |                                                                                      |                        |
|--------|--------|----------------------------|--------------------------------------------------------------------------------------|------------------------|
| PET 7  | 25.762 | Divinyl terephthalate      | 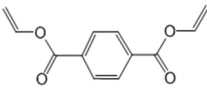    | $C_{12}H_{10}O_4$<br>4 |
| PET 8  | 26.996 | Vinyl terephthalate        |     | $C_{10}H_8O_4$         |
| PET 9  | 27.550 | Terephthalic acid          |     | $C_8H_6O_4$            |
| PET 10 | 30.457 | Anthracene                 |    | $C_{14}H_{10}$         |
| PET 11 | 32.704 | Biphenyl-4-carboxylic acid |   | $C_{13}H_{10}O_2$<br>2 |
| PET 12 | 37.707 | Ethylene glycol dibenzoate |  | $C_{16}H_{14}O_4$<br>4 |

---

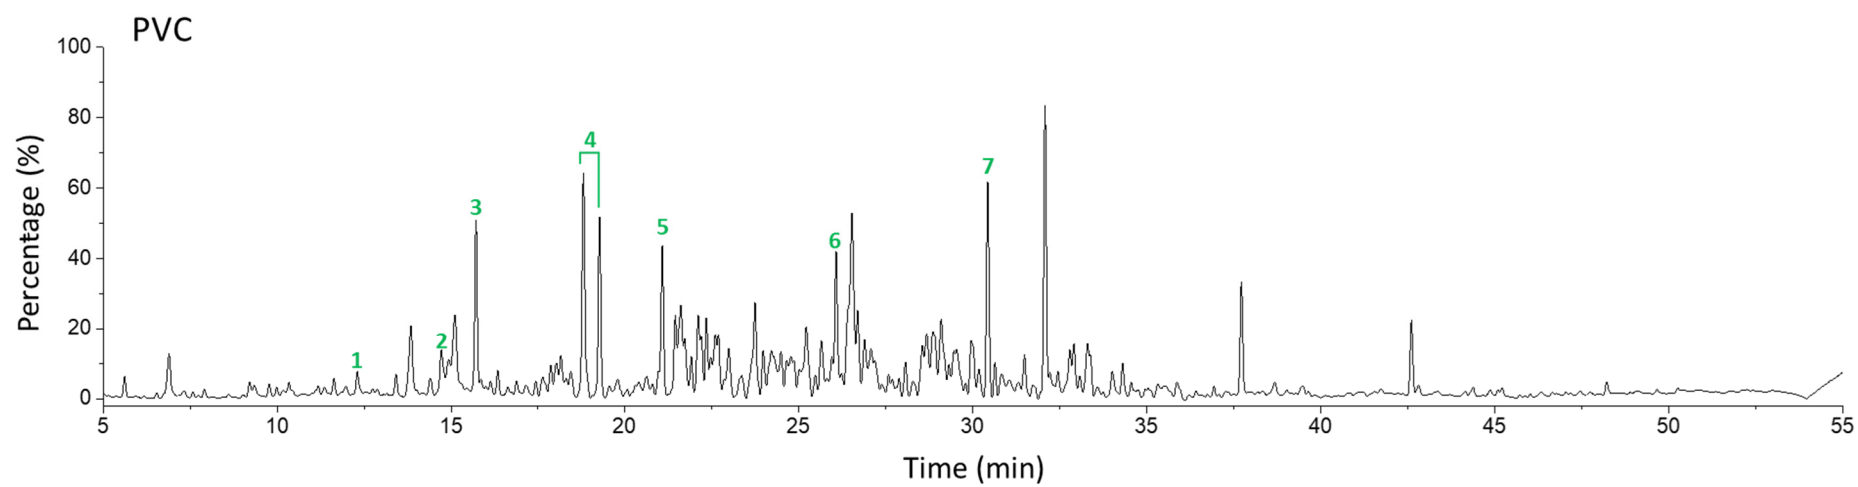

**Figure S3. Single TED-GC-MS chromatogram of PVC**

**Table. S6. Thermal degradation compounds of PVC shown in FigureS3**

| No.   | RT/min           | Compound                | Structure                                                                           | Formula        |
|-------|------------------|-------------------------|-------------------------------------------------------------------------------------|----------------|
| PVC 1 | 11.636           | Indene                  | 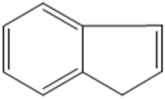   | $C_9H_8$       |
| PVC 2 | 14.715           | 1-Methylindene          |    | $C_{10}H_{10}$ |
| PVC 3 | 15.717           | Naphthalene             |    | $C_{10}H_8$    |
| PVC 4 | 18.807<br>19.283 | 2-Methyl<br>naphthalene |  | $C_{11}H_{10}$ |
| PVC 5 | 21.070           | Acenaphthene            |  | $C_{12}H_{10}$ |
| PVC 6 | 26.069           | Fluorene                |  | $C_{13}H_{10}$ |
| PVC 7 | 30.447           | Anthracene              |  | $C_{14}H_{10}$ |

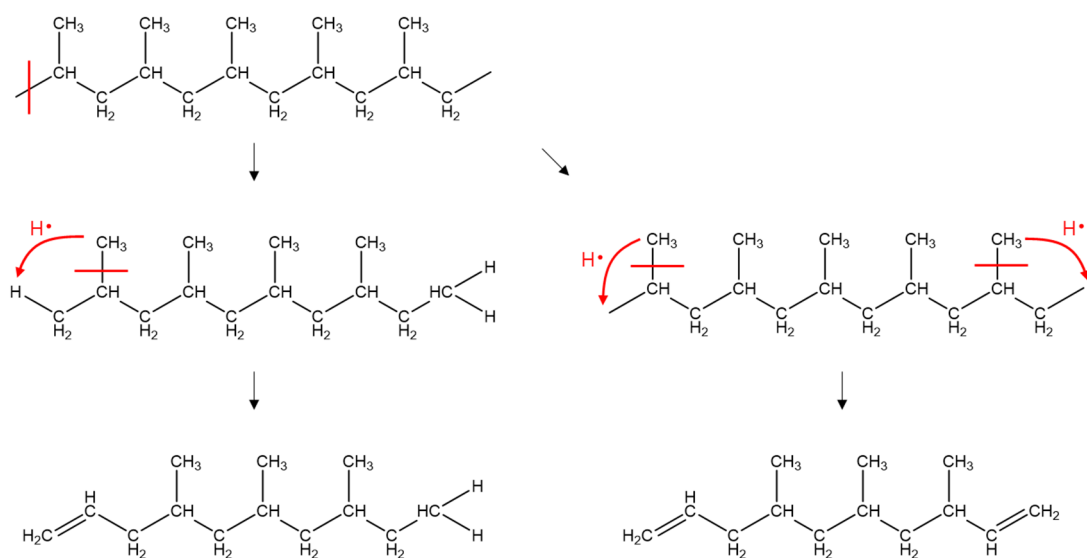

**Figure S4. Partial pyrolysis pathway of PP proposed following the IR spectrum and TED-GC-MS**

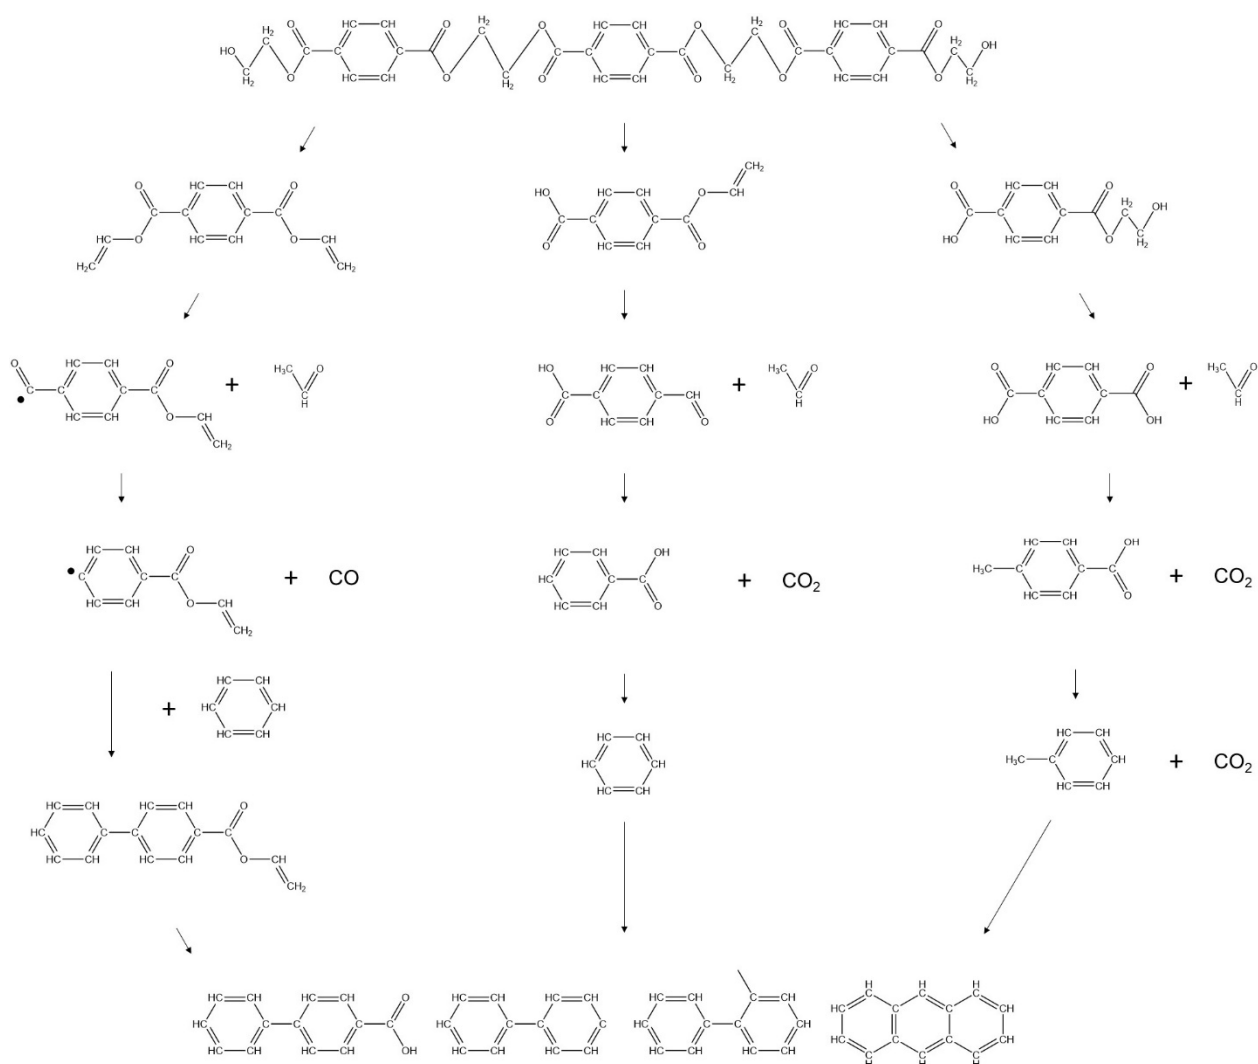

**Figure S5. Pyrolysis pathway of PP proposed following the IR spectrum and TED-GC-MS, formation of some polycyclic aromatic hydrocarbons (PAH) may not be suggested by the IR spectrum and TED-GC-MS.**
